# Supplementary material
Source: Springer Nature journal article supplement (https://www.springermedizin.de/resource/supplementary/12888_2013_1421_MOESM1_ESM.pdf/9480210)

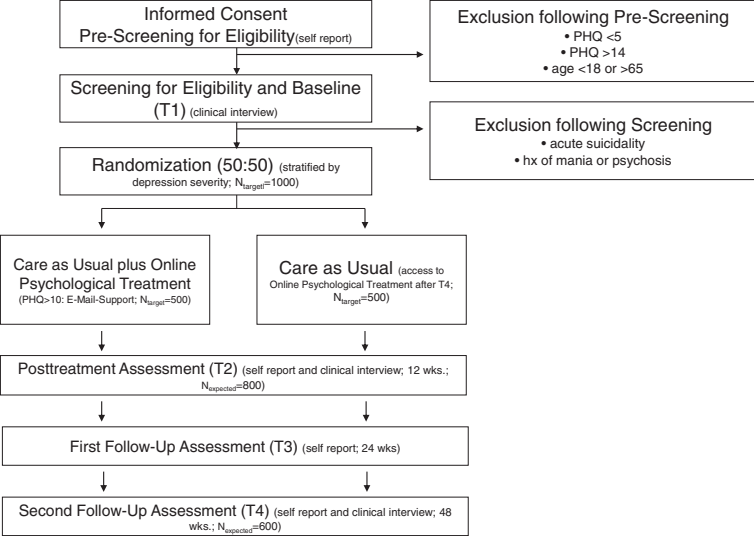

Supplement: MOESM1 [file 9480210]
